# Supplementary material for: Gene Co-Expression Analysis Reveals Transcriptome Divergence between Wild and Cultivated Sugarcane under Drought Stress
Source: MDPI journal article supplement (doi:10.3390/ijms23010569), 2022-01-05
Supplement: s1 [file s1]

**Supplementary Table S6.** KEGG enrichment of genes with the first 150 kME values

| Kegg pathway                                | ko_id   | Items | Gene_ID                                                                                                                                                                                                        |
|---------------------------------------------|---------|-------|----------------------------------------------------------------------------------------------------------------------------------------------------------------------------------------------------------------|
| Valine, leucine and isoleucine degradation  | ko00280 | 13    | So_NG107368;So_NG37445;So_NG56107;So_NG66496;So_NG66936;So_NG95465;Sspon.01G0036410-1P;Sspon.01G0036410-2C;Sspon.01G0057720-1D;Sspon.03G0015310-2B;Sspon.03G0018740-2C;Sspon.04G0030660-1C;Sspon.04G0030660-2D |
| Pantothenate and CoA biosynthesis           | ko00770 | 8     | So_NG107368;So_NG48422;So_NG66496;Sspon.01G0036410-1P;Sspon.01G0036410-2C;Sspon.01G0057720-1D;Sspon.02G0007510-2B;Sspon.02G0007510-3D                                                                          |
| Propanoate metabolism                       | ko00640 | 7     | So_NG37445;So_NG56107;So_NG66936;So_NG95465;So_NG97800;Sspon.03G0015310-2B;Sspon.03G0018740-2C                                                                                                                 |
| Peroxisome                                  | ko04146 | 9     | So_NG32819;So_NG5821;So_NG97800;Sspon.01G0007100-2C;Sspon.04G0030660-1C;Sspon.04G0030660-2D;Sspon.05G0019710-1P;Sspon.07G0008620-4D;Sspon.08G0000830-1A                                                        |
| Fatty acid degradation                      | ko00071 | 7     | So_NG107368;So_NG60598;So_NG97800;Sspon.03G0018740-2C;Sspon.04G0030660-1C;Sspon.04G0030660-2D;Sspon.05G0019710-1P                                                                                              |
| Caffeine metabolism                         | ko00232 | 3     | So_NG101430;So_NG5821;Sspon.03G0039740-1C                                                                                                                                                                      |
| Glucosinolate biosynthesis                  | ko00966 | 4     | So_NG66496;Sspon.01G0036410-1P;Sspon.01G0036410-2C;Sspon.01G0057720-1D                                                                                                                                         |
| Fatty acid metabolism                       | ko01212 | 6     | So_NG60598;So_NG97800;Sspon.03G0018740-2C;Sspon.04G0030660-1C;Sspon.04G0030660-2D;Sspon.05G0019710-1P                                                                                                          |
| beta-Alanine metabolism                     | ko00410 | 5     | So_NG107368;So_NG66936;So_NG97800;Sspon.02G0007510-2B;Sspon.02G0007510-3D                                                                                                                                      |
| Valine, leucine and isoleucine biosynthesis | ko00290 | 4     | So_NG66496;Sspon.01G0036410-1P;Sspon.01G0036410-2C;Sspon.01G0057720-1D                                                                                                                                         |
| Glyoxylate and dicarboxylate metabolism     | ko00630 | 6     | So_NG7572;Sspon.01G0002150-1P;Sspon.03G0018740-2C;Sspon.05G0008290-2B;Sspon.05G0008290-4D;Sspon.08G0000830-1A                                                                                                  |
| Lysine degradation                          | ko00310 | 5     | So_NG107368;So_NG108685;Sspon.03G0018740-2C;Sspon.04G0002070-1A;Sspon.04G0002100-1A                                                                                                                            |
| Carbon metabolism                           | ko01200 | 9     | So_NG66936;So_NG7572;So_NG97800;Sspon.01G0002150-1P;Sspon.03G0018740-2C;Sspon.05G0006050-2B;Sspon.05G0008290-2B;Sspon.05G0008290-4D;Sspon.08G0000830-1A                                                        |
| 2-Oxocarboxylic acid metabolism             | ko01210 | 5     | So_NG66496;Sspon.01G0002150-1P;Sspon.01G0036410-1P;Sspon.01G0036410-2C;Sspon.01G0057720-1D                                                                                                                     |
| Biosynthesis of unsaturated fatty acids     | ko01040 | 3     | So_NG97800;Sspon.04G0030660-1C;Sspon.04G0030660-2D                                                                                                                                                             |
| Pyruvate metabolism                         | ko00620 | 5     | So_NG107368;So_NG7572;Sspon.03G0018740-2C;Sspon.05G0008290-2B;Sspon.05G0008290-4D                                                                                                                              |
