# Supplementary material for: Gene Co-Expression Analysis Reveals Transcriptome Divergence between Wild and Cultivated Sugarcane under Drought Stress
Source: MDPI journal article supplement (doi:10.3390/ijms23010569), 2022-01-05
Supplement: s1 [file s1]

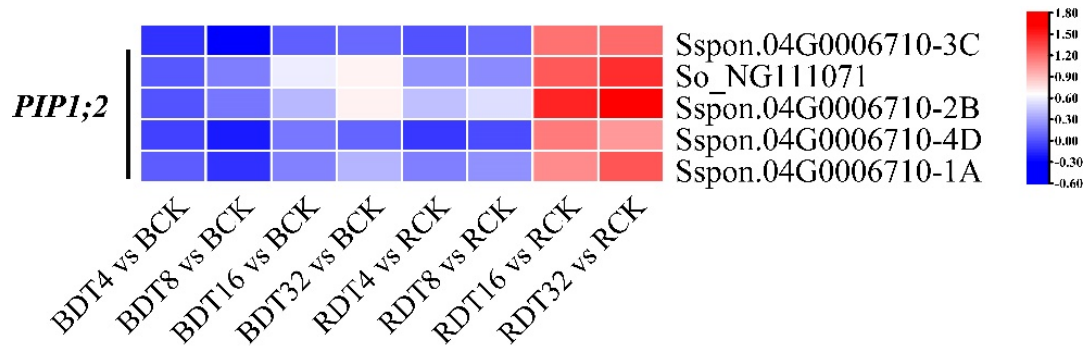

**Supplementary Figure S4.** Sugarcane *PIP1; 2* gene expression pattern. The heat map of *PIP1; 2* genes was mapped with  $\log_2(\text{FC})$  and the data were row standardized. Red indicates up-regulated expression and blue indicates down-regulated expression.
