# Supplementary material for: Gene Co-Expression Analysis Reveals Transcriptome Divergence between Wild and Cultivated Sugarcane under Drought Stress
Source: MDPI journal article supplement (doi:10.3390/ijms23010569), 2022-01-05
Supplement: s1 [file s1]

**Supplementary Table S5.** Candidate transcription factors related to drought stress response in sugarcane in lavenderblush module

| GeneID              | Family         | kME     | Module<br>Membership | gene<br>significance |
|---------------------|----------------|---------|----------------------|----------------------|
| Sspon.05G0028060-2D | AP2/ERF-ERF    | 0.97433 | 0.97433              | 0.83419              |
| Sspon.05G0028060-1B | AP2/ERF-ERF    | 0.96133 | 0.96133              | 0.80079              |
| Sspon.08G0012460-3C | AP2/ERF-ERF    | 0.93238 | 0.93238              | 0.77933              |
| Sspon.08G0012460-1P | AP2/ER[1]F-ERF | 0.94730 | 0.94730              | 0.76281              |
| So_NG37349          | AP2/ERF-ERF    | 0.96802 | 0.96802              | 0.74322              |
| Sspon.05G0018650-2B | AP2/ERF-ERF    | 0.93652 | 0.93652              | 0.72551              |
| So_NG40441          | AP2/ERF-ERF    | 0.96678 | 0.96678              | 0.71913              |
| So_NG110445         | AP2/ERF-ERF    | 0.96374 | 0.96374              | 0.71823              |
| So_NG43576          | AP2/ERF-ERF    | 0.95880 | 0.95880              | 0.70457              |
| Sspon.03G0002110-2D | AP2/ERF-ERF    | 0.96813 | 0.96813              | 0.70145              |
| So_NG101395         | AP2/ERF-ERF    | 0.96757 | 0.96757              | 0.67166              |
| So_NG3786           | AP2/ERF-ERF    | 0.94129 | 0.94129              | 0.61199              |
| Sspon.07G0002770-1A | AP2/ERF-RAV    | 0.91266 | 0.91266              | 0.56688              |
| So_NG85399          | bHLH           | 0.95551 | 0.95551              | 0.83168              |
| Sspon.05G0022410-2D | bHLH           | 0.91859 | 0.91859              | 0.82303              |
| So_NG102144         | bHLH           | 0.98947 | 0.98947              | 0.71762              |
| So_NG60494          | bHLH           | 0.93270 | 0.93270              | 0.67388              |
| Sspon.07G0006610-1A | bHLH           | 0.94819 | 0.94819              | 0.66441              |
| Sspon.04G0016220-3D | bZIP           | 0.93586 | 0.93586              | 0.87640              |
| So_NG51751          | bZIP           | 0.96897 | 0.96897              | 0.83084              |
| So_NG45035          | bZIP           | 0.92846 | 0.92846              | 0.79305              |
| So_NG49903          | bZIP           | 0.94987 | 0.94987              | 0.74309              |
| Sspon.03G0009910-1A | bZIP           | 0.98237 | 0.98237              | 0.70836              |
| Sspon.03G0009910-1P | bZIP           | 0.93359 | 0.93359              | 0.70489              |
| Sspon.06G0007540-2C | bZIP           | 0.92502 | 0.92502              | 0.69211              |
| So_NG37728          | bZIP           | 0.96340 | 0.96340              | 0.67543              |
| So_NG51149          | bZIP           | 0.94080 | 0.94080              | 0.65283              |
| Sspon.03G0009910-2P | bZIP           | 0.97459 | 0.97459              | 0.61528              |
| Sspon.07G0001780-2P | bZIP           | 0.91869 | 0.91869              | 0.60629              |
| So_NG104247         | bZIP           | 0.92590 | 0.92590              | 0.60068              |
| Sspon.06G0007540-1A | bZIP           | 0.96559 | 0.96559              | 0.59796              |
| Sspon.03G0009910-3C | bZIP           | 0.93535 | 0.93535              | 0.58205              |
| Sspon.03G0041470-1C | bZIP           | 0.90704 | 0.90704              | 0.58008              |
| Sspon.06G0007750-1A | bZIP           | 0.96061 | 0.96061              | 0.57752              |
| Sspon.07G0001780-1A | bZIP           | 0.90412 | 0.90412              | 0.55512              |
| Sspon.06G0007540-3D | bZIP           | 0.91639 | 0.91639              | 0.42658              |
| Sspon.03G0006610-2P | C2C2-GATA      | 0.90586 | 0.90586              | 0.59563              |
| Sspon.02G0029820-2B | C2H2           | 0.95086 | 0.95086              | 0.84520              |
| Sspon.02G0029820-4D | C2H2           | 0.94059 | 0.94059              | 0.81675              |
| So_NG62848          | C2H2           | 0.92215 | 0.92215              | 0.76878              |

|                     |              |         |         |         |
|---------------------|--------------|---------|---------|---------|
| So_NG9928           | C2H2         | 0.97443 | 0.97443 | 0.74175 |
| Sspon.01G0028770-3C | C2H2         | 0.91084 | 0.91084 | 0.68922 |
| So_NG16846          | C2H2         | 0.93203 | 0.93203 | 0.67442 |
| Sspon.01G0057040-1C | C2H2         | 0.90590 | 0.90590 | 0.65084 |
| So_NG2528           | GARP-G2-like | 0.91237 | 0.91237 | 0.90365 |
| So_NG106483         | GARP-G2-like | 0.92094 | 0.92094 | 0.89338 |
| Sspon.03G0025710-1B | GARP-G2-like | 0.94926 | 0.94926 | 0.59885 |
| Sspon.03G0025710-1P | GARP-G2-like | 0.93200 | 0.93200 | 0.57738 |
| So_NG96903          | GARP-G2-like | 0.92544 | 0.92544 | 0.52794 |
| Sspon.04G0036740-1D | HB-HD-ZIP    | 0.98725 | 0.98725 | 0.73401 |
| Sspon.04G0007240-2P | HB-HD-ZIP    | 0.93305 | 0.93305 | 0.72477 |
| Sspon.04G0007240-3P | HB-HD-ZIP    | 0.93308 | 0.93308 | 0.70231 |
| Sspon.04G0007240-1A | HB-HD-ZIP    | 0.91781 | 0.91781 | 0.66749 |
| Sspon.04G0007240-2B | HB-HD-ZIP    | 0.90081 | 0.90081 | 0.60578 |
| Sspon.02G0009520-3D | HB-HD-ZIP    | 0.92281 | 0.92281 | 0.56293 |
| So_NG58070          | HB-HD-ZIP    | 0.90935 | 0.90935 | 0.50274 |
| Sspon.02G0004420-1P | HB-other     | 0.94742 | 0.94742 | 0.88387 |
| Sspon.01G0005450-3D | HB-other     | 0.95214 | 0.95214 | 0.75486 |
| Sspon.01G0005450-1A | HB-other     | 0.94843 | 0.94843 | 0.73654 |
| Sspon.01G0005450-2B | HB-other     | 0.97267 | 0.97267 | 0.72010 |
| So_NG79919          | HB-WOX       | 0.92754 | 0.92754 | 0.62783 |
| Sspon.01G0058310-1D | HB-WOX       | 0.92405 | 0.92405 | 0.53902 |
| Sspon.02G0013260-1A | HSF          | 0.93896 | 0.93896 | 0.78084 |
| Sspon.01G0037770-1B | LOB          | 0.96044 | 0.96044 | 0.85380 |
| Sspon.02G0000080-2B | MYB          | 0.97762 | 0.97762 | 0.82025 |
| Sspon.01G0038440-1P | MYB          | 0.92383 | 0.92383 | 0.81621 |
| Sspon.03G0005140-2B | MYB          | 0.92950 | 0.92950 | 0.78089 |
| Sspon.02G0028760-2B | MYB          | 0.99183 | 0.99183 | 0.76856 |
| So_NG98580          | MYB          | 0.91228 | 0.91228 | 0.75754 |
| Sspon.03G0005140-1A | MYB          | 0.90520 | 0.90520 | 0.75512 |
| Sspon.02G0028760-4D | MYB          | 0.96979 | 0.96979 | 0.71738 |
| Sspon.06G0003930-4D | MYB          | 0.90491 | 0.90491 | 0.69771 |
| So_NG85383          | MYB          | 0.93066 | 0.93066 | 0.65164 |
| Sspon.04G0016420-2B | MYB          | 0.91272 | 0.91272 | 0.64801 |
| Sspon.02G0000760-3C | MYB          | 0.91289 | 0.91289 | 0.63887 |
| Sspon.03G0019490-2B | MYB          | 0.90737 | 0.90737 | 0.61251 |
| Sspon.02G0000760-4D | MYB          | 0.96971 | 0.96971 | 0.61145 |
| Sspon.06G0031730-2D | MYB          | 0.96598 | 0.96598 | 0.60133 |
| Sspon.03G0031760-2D | MYB          | 0.94499 | 0.94499 | 0.59968 |
| So_NG20048          | MYB          | 0.94150 | 0.94150 | 0.59574 |
| Sspon.02G0028760-1T | MYB-related  | 0.97939 | 0.97939 | 0.83197 |
| Sspon.02G0000080-1P | MYB-related  | 0.98365 | 0.98365 | 0.79466 |
| Sspon.03G0036680-5P | MYB-related  | 0.91794 | 0.91794 | 0.78014 |
| Sspon.02G0000080-1A | MYB-related  | 0.98266 | 0.98266 | 0.76970 |

|                     |             |         |         |         |
|---------------------|-------------|---------|---------|---------|
| Sspon.02G0028760-3C | MYB-related | 0.93140 | 0.93140 | 0.73787 |
| Sspon.02G0000080-3C | MYB-related | 0.92389 | 0.92389 | 0.65794 |
| So_NG84507          | MYB-related | 0.97191 | 0.97191 | 0.58811 |
| Sspon.07G0006960-4D | MYB-related | 0.93514 | 0.93514 | 0.55339 |
| Sspon.07G0006960-2P | MYB-related | 0.95605 | 0.95605 | 0.54040 |
| Sspon.05G0020650-3C | NAC         | 0.90985 | 0.90985 | 0.93390 |
| Sspon.05G0020650-1A | NAC         | 0.92260 | 0.92260 | 0.90059 |
| Sspon.04G0009710-1P | NAC         | 0.94579 | 0.94579 | 0.88787 |
| So_NG95774          | NAC         | 0.95975 | 0.95975 | 0.88343 |
| Sspon.04G0009710-3P | NAC         | 0.94781 | 0.94781 | 0.88342 |
| Sspon.04G0009710-4P | NAC         | 0.92711 | 0.92711 | 0.87544 |
| Sspon.03G0018230-1A | NAC         | 0.96352 | 0.96352 | 0.87377 |
| Sspon.03G0018230-3D | NAC         | 0.96473 | 0.96473 | 0.86579 |
| Sspon.01G0008840-3P | NAC         | 0.97367 | 0.97367 | 0.81044 |
| Sspon.01G0008840-2B | NAC         | 0.94730 | 0.94730 | 0.80849 |
| Sspon.01G0008870-1A | NAC         | 0.95522 | 0.95522 | 0.79645 |
| Sspon.01G0008870-2B | NAC         | 0.95467 | 0.95467 | 0.79491 |
| Sspon.01G0008870-4D | NAC         | 0.92521 | 0.92521 | 0.76741 |
| Sspon.05G0020650-2P | NAC         | 0.94762 | 0.94762 | 0.76697 |
| Sspon.03G0001860-1P | NAC         | 0.97458 | 0.97458 | 0.74723 |
| Sspon.02G0031110-2C | NAC         | 0.98751 | 0.98751 | 0.74629 |
| Sspon.01G0008840-1A | NAC         | 0.99502 | 0.99502 | 0.74347 |
| So_NG33797          | NAC         | 0.97755 | 0.97755 | 0.74190 |
| Sspon.01G0008840-4P | NAC         | 0.97829 | 0.97829 | 0.73842 |
| Sspon.01G0008840-2P | NAC         | 0.97857 | 0.97857 | 0.73465 |
| Sspon.05G0020650-1P | NAC         | 0.94984 | 0.94984 | 0.73439 |
| Sspon.02G0031110-1A | NAC         | 0.97122 | 0.97122 | 0.71624 |
| Sspon.05G0020650-3P | NAC         | 0.98054 | 0.98054 | 0.70493 |
| So_NG62385          | NAC         | 0.97691 | 0.97691 | 0.69608 |
| Sspon.01G0008840-1P | NAC         | 0.97877 | 0.97877 | 0.67761 |
| So_NG84131          | NAC         | 0.97666 | 0.97666 | 0.67726 |
| Sspon.02G0027090-3C | NAC         | 0.90434 | 0.90434 | 0.66745 |
| So_NG33798          | NAC         | 0.92378 | 0.92378 | 0.63077 |
| Sspon.02G0022250-4D | NAC         | 0.91943 | 0.91943 | 0.62185 |
| Sspon.03G0001860-2B | NAC         | 0.95012 | 0.95012 | 0.59056 |
| Sspon.01G0042440-1P | NAC         | 0.96576 | 0.96576 | 0.58478 |
| Sspon.03G0001860-3C | NAC         | 0.95684 | 0.95684 | 0.58315 |
| Sspon.07G0025430-1B | NAC         | 0.92045 | 0.92045 | 0.57936 |
| Sspon.01G0042440-1B | NAC         | 0.96249 | 0.96249 | 0.57607 |
| So_NG58969          | NAC         | 0.90054 | 0.90054 | 0.43806 |
| Sspon.03G0006000-1A | OFP         | 0.96351 | 0.96351 | 0.75817 |
| So_NG92253          | OFP         | 0.97435 | 0.97435 | 0.75461 |
| Sspon.01G0004400-1A | Tify        | 0.90048 | 0.90048 | 0.92519 |
| Sspon.07G0014340-3C | Trihelix    | 0.92091 | 0.92091 | 0.92494 |

|                     |          |         |         |         |
|---------------------|----------|---------|---------|---------|
| Sspon.04G0007250-3C | Trihelix | 0.93352 | 0.93352 | 0.88514 |
| Sspon.05G0008580-2B | Trihelix | 0.94935 | 0.94935 | 0.85608 |
| Sspon.05G0008580-3C | Trihelix | 0.96260 | 0.96260 | 0.82542 |
| So_NG60866          | Trihelix | 0.95988 | 0.95988 | 0.81546 |
| Sspon.03G0025350-4D | WRKY     | 0.95193 | 0.95193 | 0.75846 |
| Sspon.06G0025040-1B | WRKY     | 0.93880 | 0.93880 | 0.68588 |
| So_NG103504         | WRKY     | 0.97690 | 0.97690 | 0.67998 |
| Sspon.06G0001010-1A | WRKY     | 0.95145 | 0.95145 | 0.61405 |
| Sspon.03G0036630-2C | WRKY     | 0.95375 | 0.95375 | 0.60698 |
| So_NG61045          | WRKY     | 0.93043 | 0.93043 | 0.59154 |
| Sspon.06G0001010-3C | WRKY     | 0.91821 | 0.91821 | 0.57673 |
| Sspon.06G0001010-2B | WRKY     | 0.92184 | 0.92184 | 0.57174 |
| Sspon.01G0008580-2B | WRKY     | 0.93125 | 0.93125 | 0.55979 |
| So_NG6401           | zf-HD    | 0.95329 | 0.95329 | 0.84739 |

---
