# Supplementary material for: Gene Co-Expression Analysis Reveals Transcriptome Divergence between Wild and Cultivated Sugarcane under Drought Stress
Source: MDPI journal article supplement (doi:10.3390/ijms23010569), 2022-01-05
Supplement: s1 [file s1]

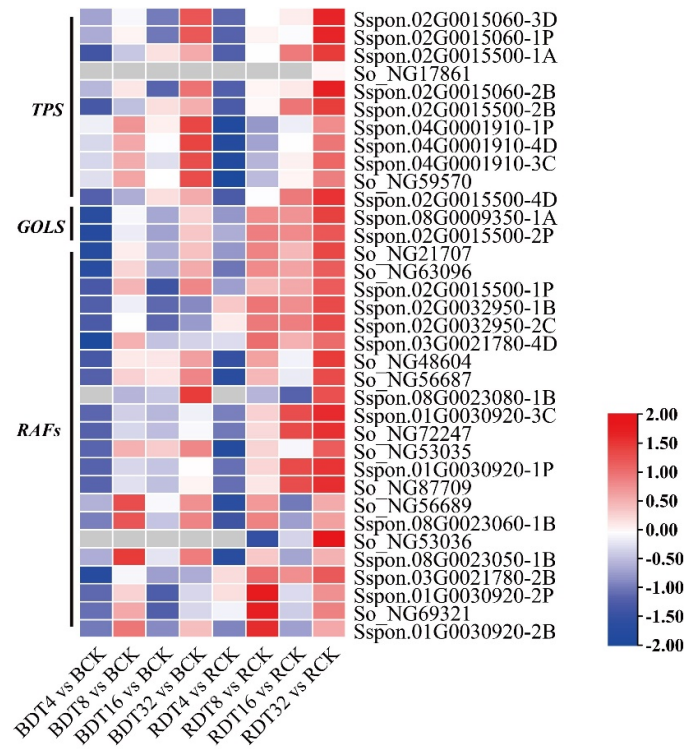

**Supplementary Figure S2.** Sugarcane TPS, GOLS and RAFs genes expression pattern. The heat map of genes was mapped with log<sub>2</sub>(FC) and the data were row standardized. Red indicates up-regulated expression and blue indicates down-regulated expression.
