# Supplementary material for: Gene Co-Expression Analysis Reveals Transcriptome Divergence between Wild and Cultivated Sugarcane under Drought Stress
Source: MDPI journal article supplement (doi:10.3390/ijms23010569), 2022-01-05
Supplement: s1 [file s1]

**Supplementary Table S3.** GO Enrichment of RCK vs BCK differentially expressed gene

| GO_ID            | GO_Term                                    | Items | Background Items | KS        |
|------------------|--------------------------------------------|-------|------------------|-----------|
| <b>Up DEGs</b>   |                                            |       |                  |           |
| GO:0006952       | defense response                           | 55    | 1495             | 8.00E-28  |
| GO:0007049       | cell cycle                                 | 12    | 90               | 2.20E-25  |
| GO:0034637       | cellular carbohydrate biosynthetic process | 16    | 246              | 2.10E-18  |
| GO:0071555       | cell wall organization                     | 33    | 1138             | 4.10E-14  |
| GO:0015979       | photosynthesis                             | 22    | 364              | 9.40E-13  |
| GO:0009522       | photosystem I                              | 42    | 77               | 2.20E-15  |
| GO:0009523       | photosystem II                             | 50    | 128              | 8.80E-14  |
| GO:0000148       | 1,3-beta-D-glucan synthase complex         | 3     | 107              | 2.90E-11  |
| GO:0016459       | myosin complex                             | 0     | 106              | 1.20E-08  |
| GO:0009535       | chloroplast thylakoid membrane             | 88    | 487              | 7.10E-08  |
| GO:0043531       | ADP binding                                | 157   | 1559             | < 1e-30   |
| GO:0003678       | DNA helicase activity                      | 16    | 337              | 6.6E-27   |
| GO:0005524       | ATP binding                                | 478   | 10712            | 9.1E-26   |
| GO:0004803       | transposase activity                       | 9     | 80               | 1.7E-21   |
| GO:0008270       | zinc ion binding                           | 149   | 3052             | 1.1E-17   |
| <b>Down DEGs</b> |                                            |       |                  |           |
| GO:0006313       | transposition, DNA-mediated                | 10    | 90               | 1.6E-26   |
| GO:0000723       | telomere maintenance                       | 12    | 246              | 2E-22     |
| GO:0006310       | DNA recombination                          | 32    | 783              | 7.3E-19   |
| GO:0015074       | DNA integration                            | 42    | 1138             | 6.4E-18   |
| GO:0031047       | gene silencing by RNA                      | 13    | 452              | 1.1E-12   |
| GO:0016459       | myosin complex                             | 5     | 106              | 5E-12     |
| GO:0000148       | 1,3-beta-D-glucan synthase complex         | 1     | 107              | 8.5E-12   |
| GO:0005663       | DNA replication factor C complex           | 4     | 54               | 0.0000014 |
| GO:0032153       | cell division site                         | 3     | 74               | 0.0000015 |
| GO:0042555       | MCM complex                                | 0     | 73               | 0.0000022 |
| GO:0005524       | ATP binding                                | 385   | 10712            | < 1e-30   |
| GO:0003678       | DNA helicase activity                      | 17    | 337              | < 1e-30   |
| GO:0043531       | ADP binding                                | 66    | 1559             | 2.4E-27   |
| GO:0004803       | transposase activity                       | 10    | 80               | 7.1E-23   |
| GO:0008270       | zinc ion binding                           | 98    | 3052             | 2.2E-19   |
