# Supplementary material for: Gene Co-Expression Analysis Reveals Transcriptome Divergence between Wild and Cultivated Sugarcane under Drought Stress
Source: MDPI journal article supplement (doi:10.3390/ijms23010569), 2022-01-05
Supplement: s1 [file s1]

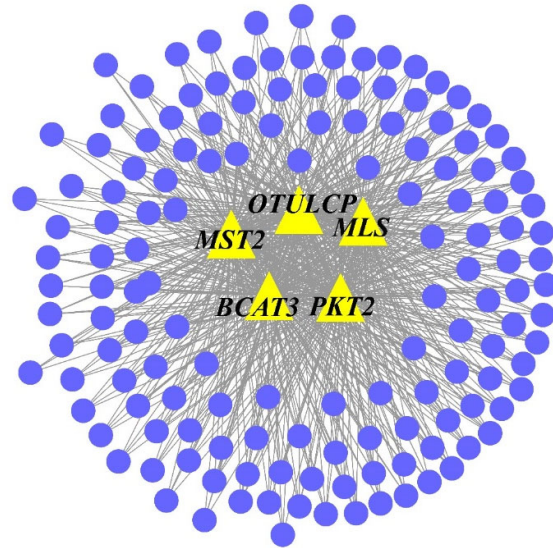

**Supplementary Figure S3.** Network diagram of DEGs with the first five KME values. The yellow triangle is the DEGs of the first five KME values, blue circles indicate genes that are related to candidate genes.
