# Supplementary material for: Gene Co-Expression Analysis Reveals Transcriptome Divergence between Wild and Cultivated Sugarcane under Drought Stress
Source: MDPI journal article supplement (doi:10.3390/ijms23010569), 2022-01-05
Supplement: s1 [file s1]

**Supplementary Table S2.** Overview of the RNA-seq data

| <b>Sample</b> | <b>Clean<br/>Reads (M)</b> | <b>Q30 (%)</b> | <b>Mapped<br/>Reads (M)(%)</b> |
|---------------|----------------------------|----------------|--------------------------------|
| BCK-1         | 30.49                      | 93.30          | 45.95 (75.34)                  |
| BCK-2         | 36.42                      | 93.43          | 55.36 (76.00)                  |
| BCK-3         | 31.79                      | 93.15          | 46.60 (73.28)                  |
| BDT4-1        | 28.30                      | 94.44          | 42.69 (75.43)                  |
| BDT4-2        | 29.44                      | 94.58          | 46.28 (78.60)                  |
| BDT4-3        | 26.01                      | 94.30          | 40.26 (77.38)                  |
| BDT8-1        | 27.72                      | 94.37          | 39.37 (71.03)                  |
| BDT8-2        | 28.99                      | 94.75          | 41.46 (71.51)                  |
| BDT8-3        | 30.32                      | 94.44          | 43.91 (72.41)                  |
| BDT16-1       | 28.48                      | 94.59          | 42.14 (73.98)                  |
| BDT16-2       | 28.85                      | 94.11          | 44.43 (77.01)                  |
| BDT16-3       | 25.21                      | 94.62          | 37.35 (74.06)                  |
| BDT32-1       | 37.85                      | 93.64          | 59.96 (79.21)                  |
| BDT32-2       | 39.16                      | 93.33          | 60.53 (77.29)                  |
| BDT32-3       | 41.94                      | 93.72          | 63.05 (75.17)                  |
| RCK-1         | 27.51                      | 94.38          | 46.52 (84.57)                  |
| RCK-2         | 36.45                      | 94.38          | 63.05 (86.50)                  |
| RCK-3         | 29.35                      | 94.14          | 49.90 (85.02)                  |
| RDT4-1        | 31.01                      | 94.57          | 52.22 (84.20)                  |
| RDT4-2        | 30.78                      | 94.44          | 51.45 (83.58)                  |
| RDT4-3        | 44.35                      | 94.69          | 73.07 (82.38)                  |
| RDT8-1        | 33.47                      | 94.43          | 55.17 (82.42)                  |
| RDT8-2        | 27.90                      | 94.18          | 46.67 (83.64)                  |
| RDT8-3        | 28.20                      | 94.58          | 46.75 (82.90)                  |
| RDT16-1       | 30.13                      | 94.44          | 50.07 (83.10)                  |
| RDT16-2       | 33.27                      | 94.54          | 54.15 (81.36)                  |
| RDT16-3       | 30.32                      | 94.33          | 50.48 (83.25)                  |
| RDT32-1       | 30.26                      | 94.29          | 51.28 (84.72)                  |
| RDT32-2       | 32.61                      | 94.41          | 54.92 (84.20)                  |
| RDT32-3       | 35.70                      | 94.34          | 60.30 (84.44)                  |
