# Supplementary material for: Gene Co-Expression Analysis Reveals Transcriptome Divergence between Wild and Cultivated Sugarcane under Drought Stress
Source: MDPI journal article supplement (doi:10.3390/ijms23010569), 2022-01-05
Supplement: s1 [file s1]

**Supplementary Table S4.** Genes of trehalose 6-phosphate synthase (TPS), galactinol synthase (GOLS) and raffinose synthase (RAFs) in sugarcane under drought stress

| ID                  | annotation                              | ID                  | annotation         |
|---------------------|-----------------------------------------|---------------------|--------------------|
| Sspon.02G0015060-3D | Alpha,alpha-trehale-phphate synthase 6  | Sspon.08G0023080-1B | Raffine synthase 6 |
| Sspon.02G0015060-1P | Alpha,alpha-trehale-phphate synthase 6  | Sspon.01G0030920-3C | Raffine synthase 2 |
| Sspon.02G0015500-1A | Alpha,alpha-trehale-phphate synthase 9  | So_NG72247          | Raffine synthase 2 |
| So_NG17861          | Alpha,alpha-trehale-phphate synthase 9  | So_NG53035          | Raffine synthase 6 |
| Sspon.02G0015060-2B | Alpha,alpha-trehale-phphate synthase 6  | Sspon.01G0030920-1P | Raffine synthase 2 |
| Sspon.02G0015500-2B | Alpha,alpha-trehale-phphate synthase 9  | So_NG87709          | Raffine synthase 2 |
| Sspon.04G0001910-1P | Alpha,alpha-trehale-phphate synthase 11 | So_NG56689          | Raffine synthase 6 |
| Sspon.04G0001910-4D | Alpha,alpha-trehale-phphate synthase 11 | Sspon.08G0023060-1B | Raffine synthase 6 |
| Sspon.04G0001910-3C | Alpha,alpha-trehale-phphate synthase 11 | So_NG53036          | Raffine synthase 6 |
| So_NG59570          | Alpha,alpha-trehale-phphate synthase 11 | Sspon.08G0023050-1B | Raffine synthase 6 |
| Sspon.02G0015500-4D | Alpha,alpha-trehale-phphate synthase 9  | Sspon.03G0021780-2B | Raffine synthase 6 |
| Sspon.08G0009350-1A | Alpha,alpha-trehale-phphate synthase 9  | Sspon.01G0030920-2P | Raffine synthase 2 |
| Sspon.02G0015500-2P | Alpha,alpha-trehale-phphate synthase 9  | So_NG69321          | Raffine synthase 2 |
| So_NG21707          | Alpha,alpha-trehale-phphate synthase 9  | Sspon.01G0030920-2B | Raffine synthase 2 |
| So_NG63096          | Alpha,alpha-trehale-phphate synthase 9  |                     |                    |
| Sspon.02G0015500-1P | Alpha,alpha-trehale-phphate synthase 10 |                     |                    |
| Sspon.02G0032950-1B | Galactinol synthase 2                   |                     |                    |
| Sspon.02G0032950-2C | Galactinol synthase 2                   |                     |                    |
| Sspon.03G0021780-4D | Raffine synthase                        |                     |                    |
| So_NG48604          | Raffine synthase 6                      |                     |                    |
| So_NG56687          | Raffine synthase 6                      |                     |                    |
