# Supplementary material for: Gene Co-Expression Analysis Reveals Transcriptome Divergence between Wild and Cultivated Sugarcane under Drought Stress
Source: MDPI journal article supplement (doi:10.3390/ijms23010569), 2022-01-05
Supplement: s1 [file s1]

**Supplementary Table S1.** Primers for RT-qPCR

| Gene ID             | Gene Name       | Forward sequence (5'-3') | Reverse sequence (5'-3') |
|---------------------|-----------------|--------------------------|--------------------------|
| Sspon.01G0008840-1A | <i>NAC87</i>    | AGATGCAGTACCAGCAGCAG     | CTTGCAGTACCTCCGGATCG     |
| Sspon.02G0028760-2B | <i>JAMYB</i>    | GCCGTCGTTTGATTATGATCAG   | GGCCCCAAAAGTTATCGGTAATG  |
| So_NG102144         | <i>bHLH84</i>   | ACGCTGGTGATGATGAGCAA     | ATCCTGTACAAAGATGGAGGTGT  |
| Sspon.02G0031110-2C | <i>NAC21/22</i> | CAACATTGCCAGCAACAGCA     | GATCAAAGCAGCCTCCCAGT     |
| Sspon.04G0036740-1D | <i>HOX24</i>    | GGTTGTCTTTGTGTATTCGAGG   | GCATATACGTACACGCCAATAC   |
| Sspon.02G0000080-1P | <i>MYB102</i>   | CAACAACAACAACAACAACGTC   | GTTGTTACATGTAGTCGCTCAC   |
| Sspon.04G0030660-1C | <i>KAT2</i>     | AGCTTTGCCGCTGTTGGAGT     | AGCAGGAATGGCCACAGCAG     |
| Sspon.02G0007510-2B | <i>UPB1</i>     | TCTCGGCACCTGATGCCTCT     | GCGGAAGGCCCACTTGTCTT     |
| Sspon.08G0000830-1A | <i>CAT1</i>     | CTAACAGGCTGCCGCGAGAA     | TTGCCTGGCAGGGTCAAAGG     |
| So_NG108312         | <i>ClpD1</i>    | CGCTCGGCCTTTGAGGAGAG     | CGTGTCAACGGGCTTGAAC      |
| Sspon.04G0021790-1P | <i>GR</i>       | GCAGGCGTTGAGGTTGACCA     | TGCTGGCCACCAAACACAGT     |
| Sspon.02G0015500-4D | <i>TPS9</i>     | CCCAGCTGACCTCCAACAGC     | CCGAATTGACCGCTCCACA      |
| Sspon.03G0022400-1A | <i>ACO</i>      | GACGGCAAAGTCTGCTGGGT     | CCACCCGATGCTCCACACTC     |
|                     | <i>GAPDH</i>    | CACGGCCACTGGAAGCA        | TCCTCAGGGTTCCTGATGCC     |
